# Supplementary material
Source: PubMed Central journal article supplement (PMC2048676)

## **Comprehensive Testing of Positionally Cloned Asthma Genes in Two Populations**

Craig P. Hersh, Benjamin A. Raby, Manuel E. Soto-Quirós, Amy J. Murphy, Lydiana Avila, Jessica Lasky-Su, Jody S. Sylvia, Barbara J. Klanderman, Christoph Lange, Scott T. Weiss, Juan C. Celedón

Online Data Supplement

## **Methods**

### *Childhood Asthma Management Program (CAMP) Genetics Ancillary Study*

CAMP is a multi-center North American clinical trial designed to investigate the long-term effects of inhaled anti-inflammatory medications in children with mild to moderate asthma (1, 2). Of the 1,041 children originally enrolled, 968 children and 1,518 parents contributed DNA samples for an ancillary study of the genetic determinants of asthma. Sufficient quantities of DNA were available for all family members for 458 of the 474 nuclear families of self-reported non-Hispanic white ancestry studied previously (3). Thirty-two of these 458 families had more than one asthmatic offspring, including thirty families with two asthmatic offspring and two families with three, resulting in a total of 497 asthmatic children available for analysis. A diagnosis of asthma was based on methacholine hyperresponsiveness ( $PC_{20} \leq 12.5$  mg/ml) and one or more of the following criteria for at least six months in the year prior to recruitment: (i) asthma symptoms at least two times per week; (ii) at least two usages per week of an inhaled bronchodilator; and (iii) use of daily asthma medication. Airway responsiveness was assessed prior to treatment randomization by methacholine challenge with the Wright nebulizer tidal breathing technique (1). Serum total immunoglobulin E (IgE) was measured by radioimmunosorbent assays from blood samples collected during the CAMP screening sessions. The Institutional Review Board of the Brigham and Women's Hospital (BWH), as well as those of the other CAMP study centers, approved this study. Informed assent and consent were obtained from the study participants and their parents to collect DNA for genetic studies.

### *Costa Rica Study*

Schoolchildren aged 6-14 years with asthma were recruited through 95 schools in the Central Valley of Costa Rica, as previously described (4). The Central Valley is a relatively genetically isolated population (5), with extensive genealogical records that can be used to trace ancestry back to approximately 4000 founding individuals in the 1697 census (6). Inclusion criteria included physician-diagnosed asthma, at least two respiratory symptoms (cough, wheeze or dyspnea) or a history of asthma attacks in the previous year, and a high probability of having at least at least six great-grandparents born in the Central Valley of Costa Rica (as determined by our study genealogist on the basis of the paternal and maternal last names of each of the child's parents). The latter criterion was required to increase the likelihood that children would be descendants of the founder population of the Central Valley (7); the birthplace of great-grandparents of participating children was later confirmed by our genealogy team by review of notary and/or church records. Of the participating children, 91% had confirmation of having at least six great-grand parents born in the Central Valley (lack of confirmation was mostly due to adoption or birth out of wedlock). Parents of probands were invited to participate. Parents provided written informed consent for themselves and for their children, who also gave written assent. The study was approved by the Institutional Review Boards of BWH and the Hospital Nacional de Niños, San José, Costa Rica.

Phenotyping protocols have been previously described (4). For each proband, a parent completed a study questionnaire, which was a modified version of that used by the Collaborative Study on the Genetics of Asthma (CSGA)(8) that had been translated into Spanish. Spirometry was performed according to American Thoracic Society standards

(9, 10). Methacholine challenge testing utilized a modified version of the Chatham protocol (11, 12). Serum total IgE levels were determined by the UniCAP 250 system (Pharmacia & Upjohn, Kalamazoo, MI), with samples measured in duplicate (13).

### *SNP Selection and Genotyping*

Using genotype data from European-Americans (CEU) in the International HapMap project (14), we applied a linkage disequilibrium (LD) tagging algorithm to capture common variation ( $r^2 > 0.8$ , minor allele frequency  $> 0.1$ ) across the genes studied (15). In addition, we included SNPs that were associated with asthma or asthma-related phenotypes in the original reports. Results for sixteen SNPs in ADAM33 have been previously published for CAMP (3). Additional ADAM33 SNPs were genotyped in CAMP to complete the LD-tagging of the locus.

SNPs were genotyped in a highly multiplexed allele-specific hybridization assay with the Illumina Bead Station 500G (San Diego, CA). Mendelian transmission was tested with PedCheck (16), and inconsistent SNPs and individuals were removed from analysis. The list of SNPs successfully genotyped in both cohorts is shown in Table E1 (online only).

### *Statistical Analysis*

Pairwise LD was expressed as both  $D'$  and  $r^2$ , calculated using Haploview (17). To ensure phenotype comparability to the CAMP enrollment criteria, a strict definition of asthma was used in the Costa Rica study, which included methacholine hyperresponsiveness ( $PD_{20} \leq 8.58 \mu\text{moles}$ ) or bronchodilator responsiveness plus the

recruitment criteria above. In addition to asthma, two intermediate phenotypes common to both cohorts were analyzed: (i) airways hyperresponsiveness (AHR), measured as  $\log_{10}$ -transformed dose-response slope to methacholine (18); and (ii)  $\log_{10}$ -transformed total serum IgE levels (19). Haplotype blocks were defined using the Gabriel algorithm (20), and haplotype-tagging SNPs were identified in Haploview. Family-based association testing of single SNPs and haplotypes was performed using PBAT software (21) under additive genetic models. The family-based association test is a generalization of the transmission disequilibrium test that allows for the analysis of quantitative traits, tests of different genetic models, and missing parental genotypes (22). Analyses of the two quantitative traits were adjusted for age and gender; AHR analysis was additionally adjusted for height. No covariates were included in the asthma analyses (23). Power for replication of both affection status and the quantitative traits was estimated in PBAT. Additional statistical analyses were performed in SAS version 9.1 (Cary, NC) and in R. Since these genes have all been associated with asthma phenotypes in prior studies, we used a  $p$ -value  $< 0.05$  in both samples to define statistical significance in the setting of multiple tests, instead of an adjusted  $p$ -value (24). If we consider a gene-based multiple comparisons correction (given the relatively tight LD within each gene), a global  $\alpha$  level of 0.05 still would be preserved after correction for the number of tests conducted ( $0.0025 * 5 \text{ genes} * 3 \text{ phenotypes} = 0.0375$ ).

## References

- E1. The Childhood Asthma Management Program (CAMP): design, rationale, and methods. Childhood Asthma Management Program Research Group. *Control Clin Trials* 1999;20:91-120.
- E2. Long-term effects of budesonide or nedocromil in children with asthma. The Childhood Asthma Management Program Research Group. *N Engl J Med* 2000;343:1054-63.
- E3. Raby BA, Silverman EK, Kwiatkowski DJ, Lange C, Lazarus R, Weiss ST. ADAM33 polymorphisms and phenotype associations in childhood asthma. *J Allergy Clin Immunol* 2004;113:1071-8.
- E4. Hunninghake GM, Soto-Quiros ME, Avila L, Ly NP, Liang C, Sylvia JS, Klanderman BJ, Silverman EK, Celedon JC. Sensitization to *Ascaris lumbricoides* and severity of childhood asthma in Costa Rica. *J Allergy Clin Immunol* 2007;119:654-61.
- E5. Service S, DeYoung J, Karayiorgou M, Roos JL, Pretorius H, Bedoya G, Ospina J, Ruiz-Linares A, Macedo A, Palha JA, et al. Magnitude and distribution of linkage disequilibrium in population isolates and implications for genome-wide association studies. *Nat Genet* 2006;38:556-60.
- E6. Melendez C. Conquistadores y Pobladores: Origenes Historico-Sociales de los Costarricenses. San Jose, Costa Rica: Editorial Universidad Estatal a Distancia;1982.
- E7. Escamilla MA, Spesny M, Reus VI, Gallegos A, Meza L, Molina J, Sandkuijl LA, Fournier E, Leon PE, Smith LB, et al. Use of linkage disequilibrium approaches to map genes for bipolar disorder in the Costa Rican population. *Am J Med Genet* 1996;67:244-53.

- E8. Blumenthal MN, Banks-Schlegel S, Bleecker ER, Marsh DG, Ober C. Collaborative studies on the genetics of asthma--National Heart, Lung and Blood Institute. *Clin Exp Allergy* 1995;25 Suppl 2:29-32.
- E9. American Thoracic Society. Standardization of Spirometry, 1994 Update. *Am J Respir Crit Care Med* 1995;152:1107-36.
- E10. Hersh CP, Soto-Quiros ME, Avila L, Lake SL, Liang C, Fournier E, Spesny M, Sylvia JS, Lazarus R, Hudson T, et al. Genome-wide linkage analysis of pulmonary function in families of children with asthma in Costa Rica. *Thorax* 2007;62:224-230.
- E11. Chatham M, Bleecker ER, Norman P, Smith PL, Mason P. A screening test for airways reactivity. An abbreviated methacholine inhalation challenge. *Chest* 1982;82:15-8.
- E12. Celedon JC, Soto-Quiros ME, Avila L, Lake SL, Liang C, Fournier E, Spesny M, Hersh CP, Sylvia JS, Hudson TJ, et al. Significant linkage to airway responsiveness on chromosome 12q24 in families of children with asthma in Costa Rica. *Hum Genet* 2007;120:691-699.
- E13. Raby BA, Soto-Quiros ME, Avila L, Lake SL, Murphy A, Liang C, Fournier E, Spesny M, Sylvia JS, Verner A, et al. Sex-specific linkage to total serum immunoglobulin E in families of children with asthma in Costa Rica. *Hum Mol Genet* 2007;16:243-53.
- E14. The International HapMap Project. *Nature* 2003;426:789-96.
- E15. de Bakker PI, Yelensky R, Pe'er I, Gabriel SB, Daly MJ, Altshuler D. Efficiency and power in genetic association studies. *Nat Genet* 2005;37:1217-23.

- E16. O'Connell JR, Weeks DE. PedCheck: a program for identification of genotype incompatibilities in linkage analysis. *Am J Hum Genet* 1998;63:259-66.
- E17. Barrett JC, Fry B, Maller J, Daly MJ. Haploview: analysis and visualization of LD and haplotype maps. *Bioinformatics* 2005;21:263-5.
- E18. O'Connor G, Sparrow D, Taylor D, Segal M, Weiss S. Analysis of dose-response curves to methacholine. An approach suitable for population studies. *Am Rev Respir Dis* 1987;136:1412-7.
- E19. Barbee RA, Halonen M, Lebowitz M, Burrows B. Distribution of IgE in a community population sample: correlations with age, sex, and allergen skin test reactivity. *J Allergy Clin Immunol* 1981;68:106-11.
- E20. Gabriel SB, Schaffner SF, Nguyen H, Moore JM, Roy J, Blumenstiel B, Higgins J, DeFelice M, Lochner A, Faggart M, et al. The structure of haplotype blocks in the human genome. *Science* 2002;296:2225-9.
- E21. Lange C, DeMeo D, Silverman EK, Weiss ST, Laird NM. PBAT: tools for family-based association studies. *Am J Hum Genet* 2004;74:367-9.
- E22. Rabinowitz D, Laird N. A unified approach to adjusting association tests for population admixture with arbitrary pedigree structure and arbitrary missing marker information. *Hum Hered* 2000;50:211-23.
- E23. Poisson LM, Rybicki BA, Coon SW, Barnholtz-Sloan JS, Chase GA. Susceptibility scoring in family-based association testing. *BMC Genet* 2003;4 Suppl 1:S49.
- E24. Sladek R, Rocheleau G, Rung J, Dina C, Shen L, Serre D, Boutin P, Vincent D, Belisle A, Hadjadj S, et al. A genome-wide association study identifies novel risk loci for type 2 diabetes. *Nature* 2007;445:881-5.



## Figure Legends

Figure E1: Detailed linkage disequilibrium (LD) plots in GPR154 (NPSR1) in the (A) Costa Rica and (B) CAMP studies. LD is measured as  $D'$ , with darker red colors indicating higher values. Haplotype blocks are defined using the confidence interval method (20). Online only.

Table E1: SNPs successfully genotyped in Costa Rica and CAMP studies. Online only.

| <b>Gene</b> | <b>SNP</b>     | <b>Location*</b> |
|-------------|----------------|------------------|
| ADAM33      | rs2787094      | chr20:3597161    |
|             | rs677044       | chr20:3597431    |
|             | rs628965       | chr20:3597713    |
|             | rs630712       | chr20:3598066    |
|             | rs2280090      | chr20:3598205    |
|             | rs597980       | chr20:3599165    |
|             | rs44707        | chr20:3599226    |
|             | rs615436       | chr20:3600835    |
|             | rs3918395      | chr20:3601149    |
|             | rs2280093      | chr20:3601692    |
|             | rs2485700      | chr20:3602993    |
| rs487377    | chr20:3606931  |                  |
| DPP10       | rs10208402     | chr2:114920147   |
|             | rs6737251      | chr2:114929905   |
|             | rs975453       | chr2:115783214   |
|             | rs2420815      | chr2:115794672   |
|             | rs7589983      | chr2:115843613   |
|             | rs1980189      | chr2:115867543   |
|             | rs12711825     | chr2:115884302   |
|             | rs843385       | chr2:115893809   |
|             | rs1521079      | chr2:115899494   |
|             | rs1448461      | chr2:115945009   |
|             | rs982174       | chr2:115971413   |
|             | rs2008031      | chr2:116027070   |
|             | rs7576583      | chr2:116056043   |
|             | rs4516432      | chr2:116098127   |
|             | rs4538204      | chr2:116109896   |
|             | rs12105131     | chr2:116112288   |
|             | rs4241136      | chr2:116129881   |
|             | rs7575094      | chr2:116161946   |
|             | rs2901392      | chr2:116173021   |
|             | rs2421277      | chr2:116186655   |
|             | rs2901396      | chr2:116233972   |
|             | rs2034257      | chr2:116249176   |
| rs10496510  | chr2:116297183 |                  |
| rs2421343   | chr2:116306653 |                  |
| rs272071    | chr2:116322805 |                  |
| GPR154      | rs2609234      | chr7:34461665    |
|             | rs1006392      | chr7:34464182    |
|             | rs714588       | chr7:34466466    |
|             | rs898070       | chr7:34472105    |
|             | rs1379928      | chr7:34474529    |
|             | rs963218       | chr7:34485009    |
|             | rs2609215      | chr7:34489007    |
|             | rs10274146     | chr7:34492887    |
|             | rs323917       | chr7:34514883    |
| rs323920    | chr7:34520257  |                  |

|                             |            |                |
|-----------------------------|------------|----------------|
|                             | rs324377   | chr7:34529215  |
|                             | rs6961859  | chr7:34533448  |
|                             | rs324381   | chr7:34541351  |
|                             | rs182718   | chr7:34543239  |
|                             | rs1419789  | chr7:34543803  |
|                             | rs324957   | chr7:34574612  |
|                             | rs324960   | chr7:34575631  |
|                             | rs10278663 | chr7:34581711  |
|                             | rs740347   | chr7:34585542  |
|                             | rs324981   | chr7:34591353  |
|                             | rs1860370  | chr7:34637678  |
|                             | rs727162   | chr7:34647278  |
|                             | rs10250709 | chr7:34660065  |
|                             | rs6972158  | chr7:34662422  |
|                             | rs10238983 | chr7:34672813  |
|                             | rs2040854  | chr7:34678046  |
|                             | rs1833090  | chr7:34681026  |
| HLA-G                       | rs1736920  | chr6:29905152  |
|                             | rs2517892  | chr6:29909453  |
| SETDB2/<br>PHF11/<br>RCBTB1 | rs7987940  | chr13:48906647 |
|                             | rs7982297  | chr13:48925271 |
|                             | rs7338755  | chr13:48927977 |
|                             | rs9316454  | chr13:48940485 |
|                             | rs7998427  | chr13:48948621 |
|                             | rs2057413  | chr13:48955098 |
|                             | rs11619265 | chr13:48955634 |
|                             | rs4941643  | chr13:48966388 |
|                             | rs3794381  | chr13:48971564 |
|                             | rs2031532  | chr13:48978848 |
|                             | rs2247119  | chr13:48985143 |
|                             | rs9568232  | chr13:48987845 |
|                             | rs2274276  | chr13:48993954 |
|                             | rs7332573  | chr13:48996377 |
|                             | rs7333668  | chr13:48999527 |
|                             | rs3829366  | chr13:49001412 |
|                             | rs3186013  | chr13:49005905 |
|                             | rs1925742  | chr13:49007585 |
|                             | rs7982555  | chr13:49009511 |
|                             | rs2407697  | chr13:49018436 |
|                             | rs3751383  | chr13:49021650 |
|                             | rs3751381  | chr13:49021833 |
|                             | rs942871   | chr13:49022622 |
|                             | rs9568246  | chr13:49023623 |
|                             | rs2274278  | chr13:49024383 |
|                             | rs6561542  | chr13:49025521 |
|                             | rs2038881  | chr13:49033178 |
|                             | rs11148151 | chr13:49042614 |
|                             | rs7981396  | chr13:49049927 |
|                             | rs1359541  | chr13:49056940 |
|                             | rs1325659  | chr13:49059043 |

rs1409015 chr13:49062564

\*May 2004 human genome reference sequence (NCBI Build 35).

Table E2: Genetic associations with total Immunoglobulin E levels in Costa Rica and CAMP studies. SNPs with p-value  $\leq 0.05$  in either cohort are listed. No SNPs in ADAM33, DPP10, or HLAG (see Table E1 for list) were significant in either cohort. Online only.

| Gene   | SNP       | Costa Rica |           |         | CAMP |           |         |
|--------|-----------|------------|-----------|---------|------|-----------|---------|
|        |           | MAF*       | Families† | P-value | MAF* | Families† | P-value |
| GPR154 | rs1860370 | 0.04       | 60        | 0.04    | 0.08 | 129       | 0.09    |
| PHF11  | rs9568232 | 0.14       | 166       | 0.9     | 0.08 | 122       | 0.03    |

\*MAF=minor allele frequency.

†Number of informative families.

Figure E1: (A.)

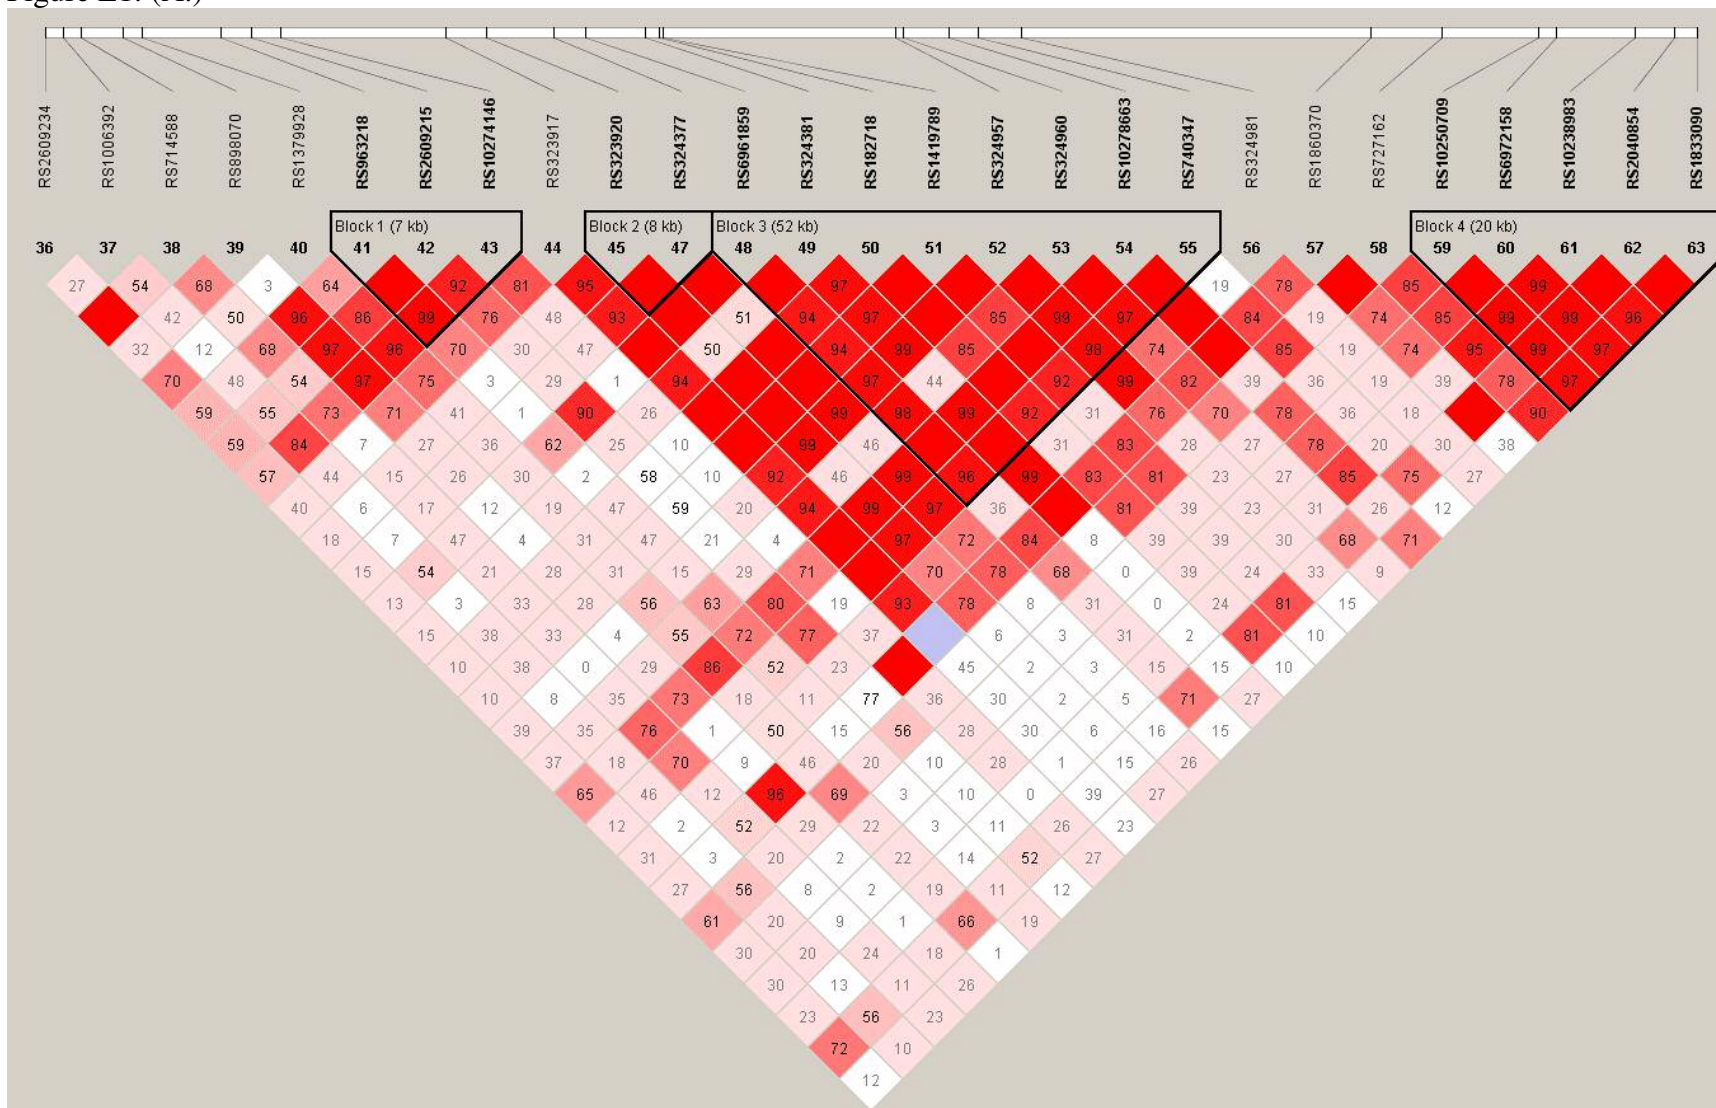

Supplement: ajrccm_176_9_849__1.pdf [file ajrccm_176_9_849__1.pdf]
